# Supplementary material for: Defining compartmentalized stem cell populations with distinct cell division dynamics in the ocular surface epithelium
Source: PubMed Central journal article supplement (PMC7758628; doi:10.1242/dev.197590), 2020-12-16
Supplement: develop-147-197590-s1.pdf [file develop-147-197590-s1.pdf]

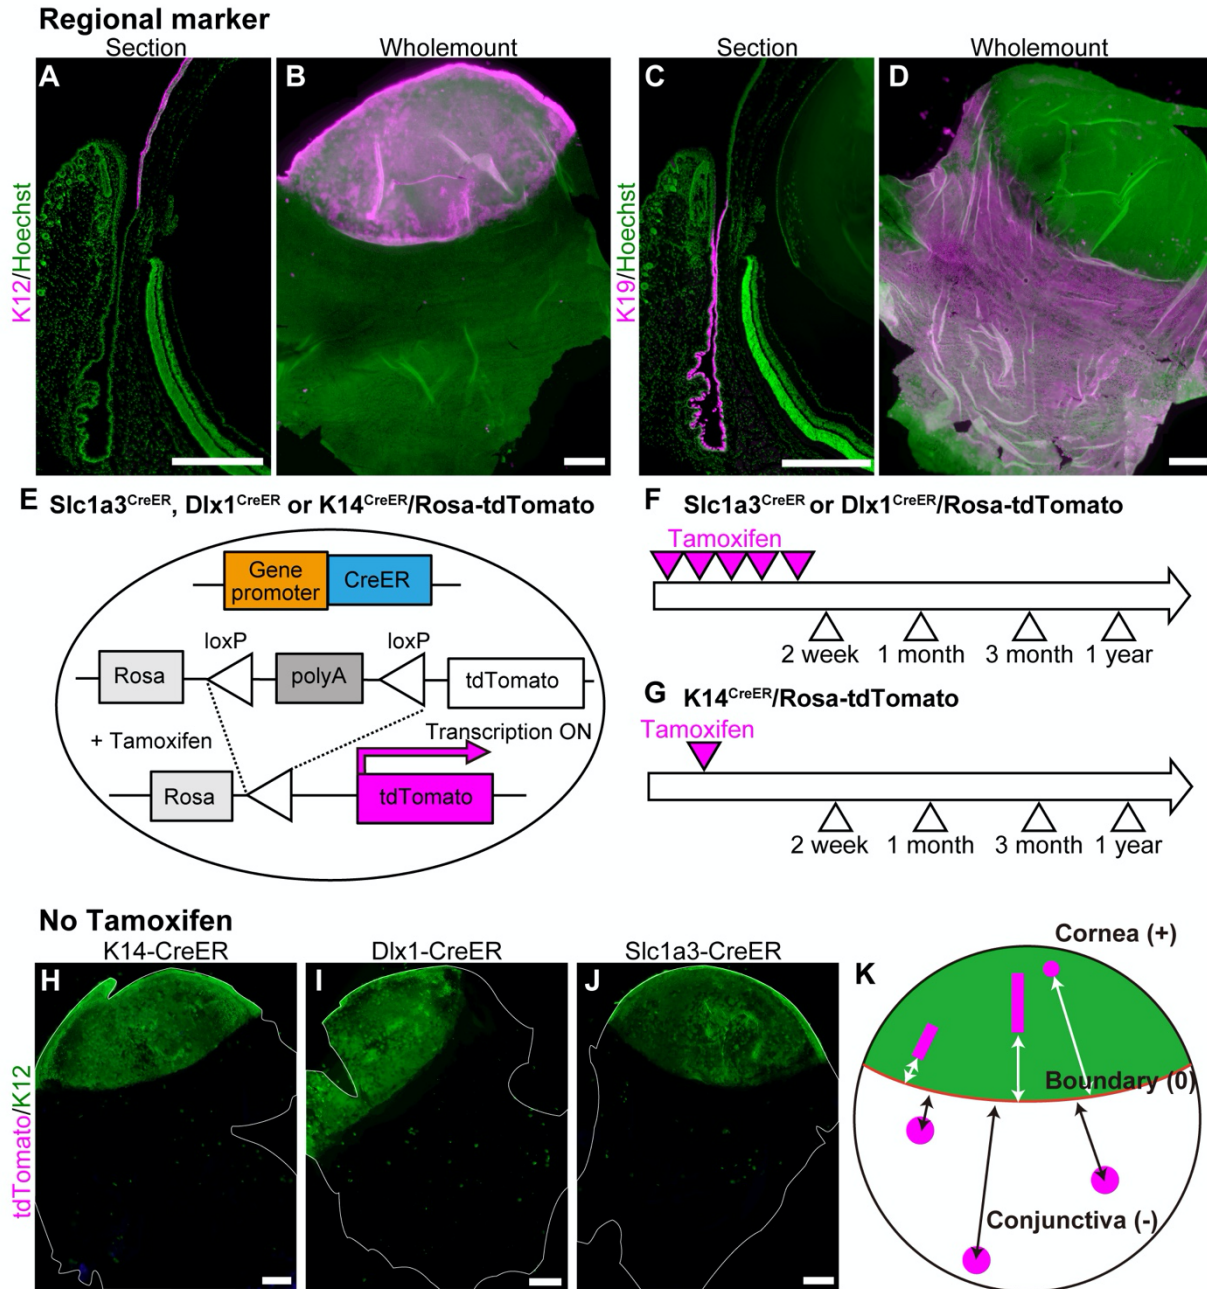

**Figure S1. Tamoxifen-inducible Cre for cell fate tracking.** (A–D) Immunostaining of wild-type mouse eye on section (A, C) or whole-mounts (B, D). K12 and K19 (magenta) were used as markers of the corneal and conjunctival epithelium, respectively. Hoechst nuclear staining in green. Scale bars: 500  $\mu$ m. (E) Schematic representation of the tamoxifen-inducible CreER system. (F, G) Scheme for long-term lineage tracing. Schedule of tamoxifen injection (magenta arrowheads) and tissue collection (white arrowheads) is shown. (H–J)  $K14^{CreER}$ ,  $Dlx1^{CreER}$  and  $Slc1a3^{CreER}$  without tamoxifen injection. The white line outlines the whole-mount epithelial sheets. Magenta, tdTomato. Green, K12 (corneal marker). Scale bars: 500  $\mu$ m. (K) Diagram shows the measurement of the length between the peripheral edge of the tdTomato<sup>+</sup> clone and the corneal/conjunctival boundary.

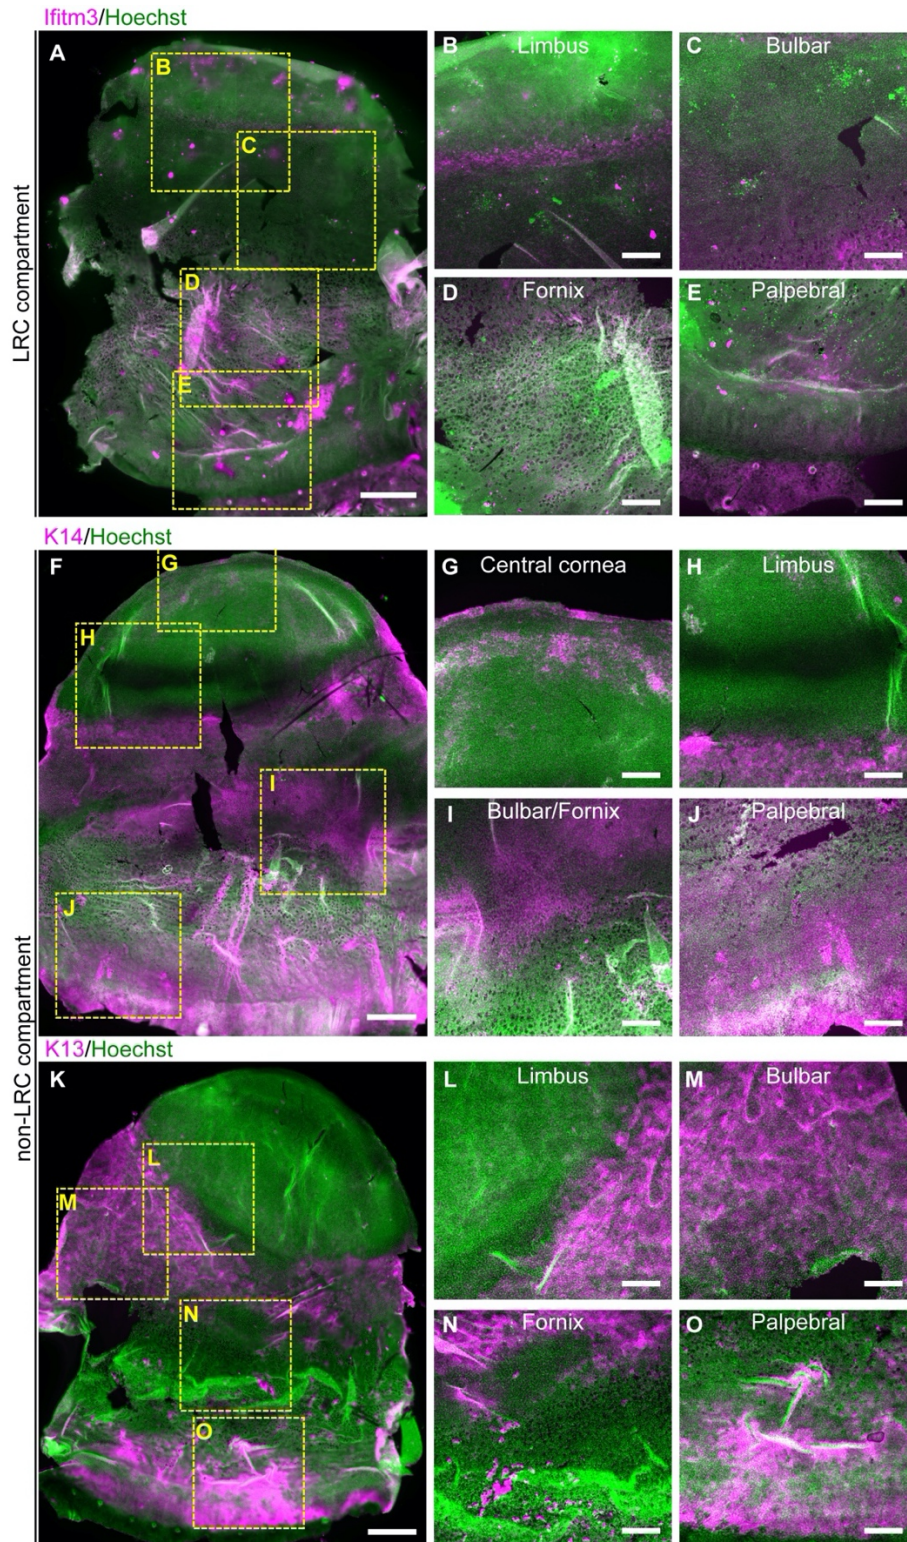

**Figure S2. Regional markers to define distinct compartments in the ocular surface epithelium.** (A-O) A whole-mount staining of epithelial sheets. Areas surrounded by the yellow dashed square are shown with higher magnification (B-E, G-J, L-O). Magenta, Ifitm3 (A-E), K14 (F-J) and K13 (K-O). Green, Hoechst. Scale bars: 500  $\mu$ m (A, F, K), 200  $\mu$ m (B-E, G-J, L-O).

**Slc1a3<sup>CreER</sup>**

**Limbus tdTomato/Hoechst**

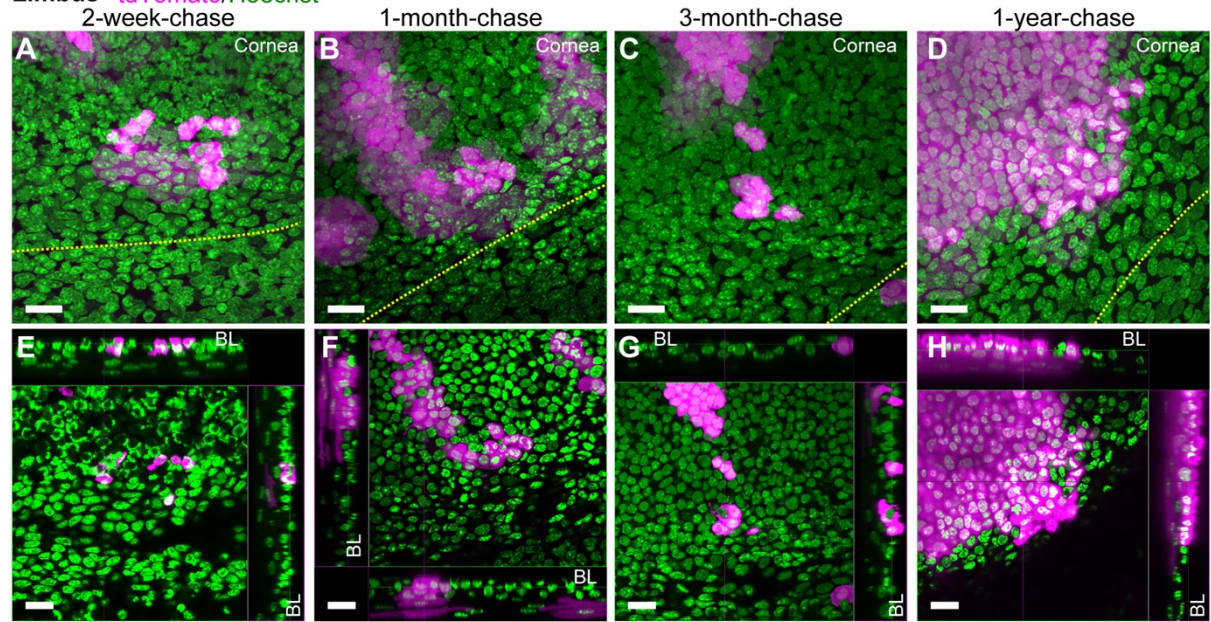

1-year-chase

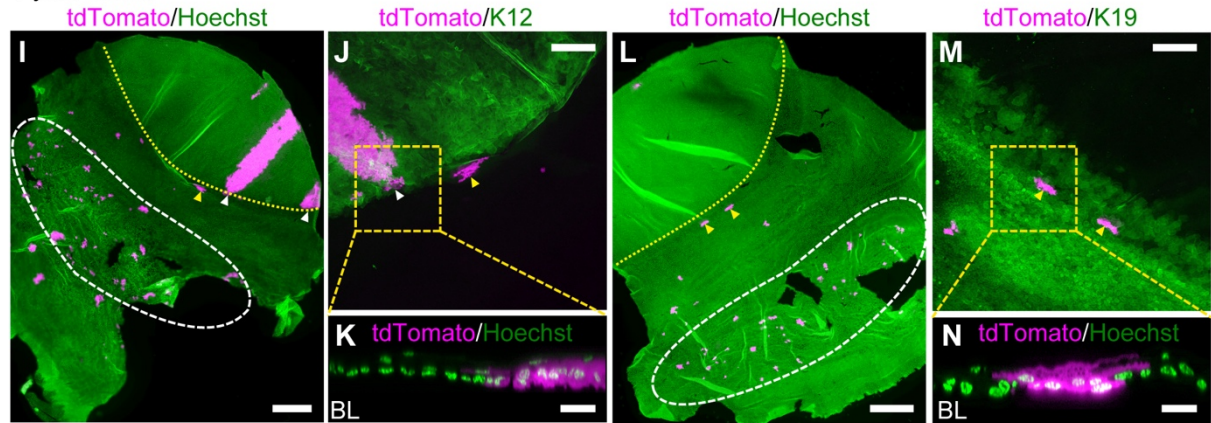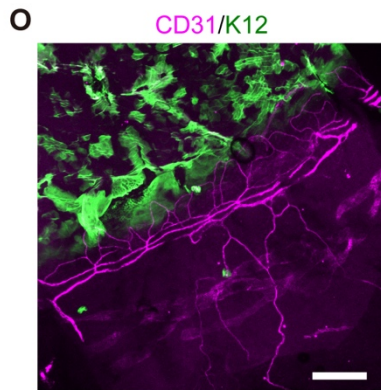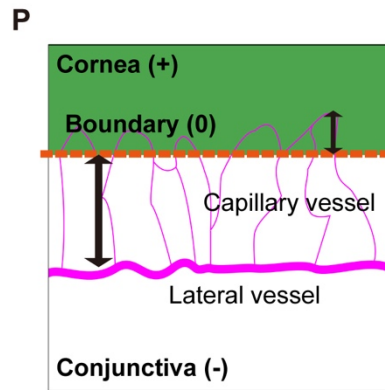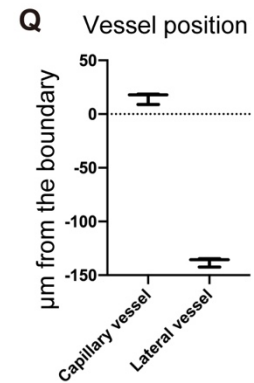

**Figure S3. Lineage tracing of *Slc1a3*<sup>CreER</sup> in the cornea.** (A-H) Confocal imaging of representative clones at 2-week-, 1-month-, 3-month-, and 1-year-chases. The areas surrounded by the yellow dashed line in Fig. 2E-H are shown. Images are shown as a maximum-intensity projection (A-D) or confocal sections of the xy, yz, and xz planes of basal clones (E-H; BL, basal layer). The yellow dashed line represents the corneal/conjunctival boundary (A-D). Magenta, tdTomato. Green, Hoechst. Scale bars: 20  $\mu\text{m}$ . (I-N) Mouse eyes were analyzed by whole-mount immunostaining at 1-year-chase. The yellow dashed line indicates the corneal/conjunctival boundary. The white dashed line represents the tdTomato<sup>+</sup> cell-enriched area in the fornix conjunctiva. Central corneal areas are shown with higher magnification (J, M) and as a side view of Z-stack confocal images (K, N; BL, basal layer). White arrowheads indicate tdTomato<sup>+</sup> radial stripes extended from the limbus. Yellow arrowheads indicate tdTomato<sup>+</sup> clones expanded laterally within the limbal region. Magenta, tdTomato. Green, K12 (J, corneal marker). Green, K19 (M, conjunctival marker). Green, Hoechst (I, K, L, N). Scale bars: 500  $\mu\text{m}$  (I, L), 200  $\mu\text{m}$  (J, M), 20  $\mu\text{m}$  (K, N). (O) Immunostaining of wild-type mouse eye on whole-mounts. Magenta, CD31 (blood vessels). Green, K12 (corneal marker). Scale bars: 200  $\mu\text{m}$ . (P) Diagram shows the measurement of the length between the peripheral edge of lateral vessel/capillary vessels and the corneal/conjunctival boundary. (Q) The positions of blood vessels are measured from the boundary.  $N = 3$  mice. Data are shown as means  $\pm$  SD.

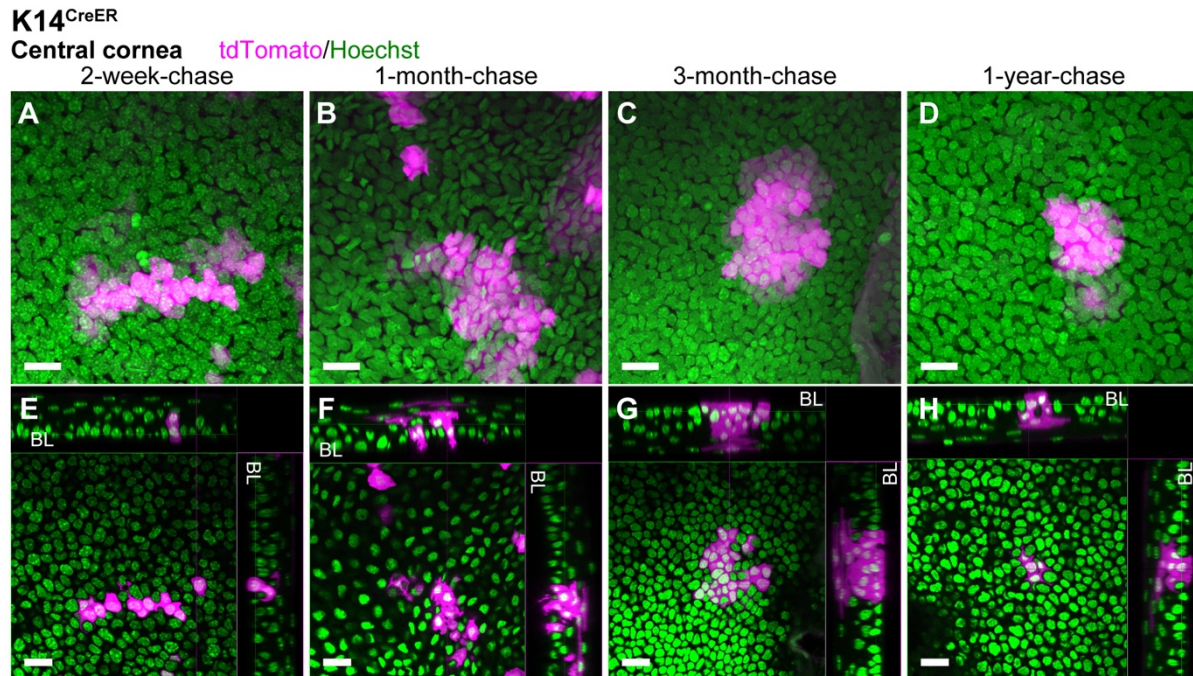

**Figure S4. Lineage tracing of K14<sup>CreER</sup> in the cornea.** (A-H) Confocal imaging of representative clones at 2-week-, 1-month-, 3-month-, and 1-year-chases. The areas surrounded by the yellow dashed line in Fig. 3E-H are shown. Images are shown as a maximum-intensity projection (A-D) or confocal sections of the xy, yz, and xz planes of basal clones (E-H; BL, basal layer). Magenta, tdTomato. Green, Hoechst. Scale bars: 20  $\mu$ m.

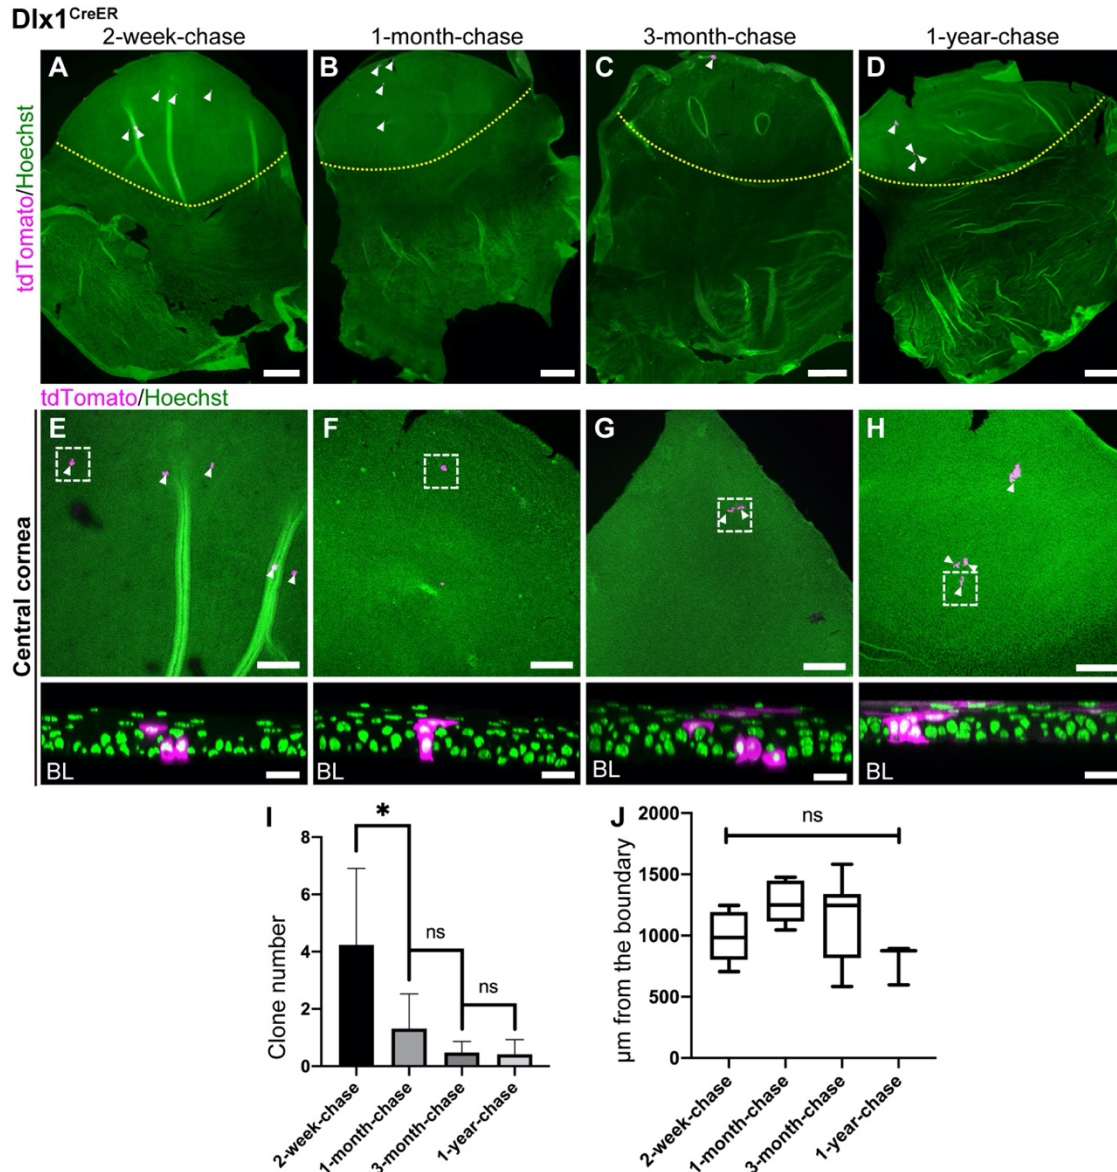

**Figure S5. Lineage tracing of *Dlx1*<sup>CreER</sup> in the cornea.** (A-H) Mouse eyes were analyzed by whole-mount immunostaining at 2-week-, 1-month-, 3-month-, and 1-year-chases. Central corneal areas are shown as a maximum-intensity projection (E-H, top). The areas surrounded by white dashed lines are shown as a side view of Z-stack confocal images (E-H, bottom; BL, basal layer). The yellow dashed line indicates the corneal/conjunctival boundary (A-D). Arrowheads indicate tdTomato<sup>+</sup> cells (A-H). Magenta, tdTomato. Green, Hoechst. Scale bars: 500 μm (A-D), 200 μm (E-H, top), 20 μm (E-H, bottom). (I) The number of tdTomato<sup>+</sup> clones per half whole-mount sample is quantified at indicated time points. One-way ANOVA followed by Bonferroni test. \*;  $P < 0.05$ . ns: not significant. (J) Box plot showing the distance of tdTomato<sup>+</sup> clones from the corneal/conjunctival boundary at indicated time points of chase.  $N = 3$  mice at 2-week-chase,  $N = 3$  mice at 4-week-chase,  $N = 7$  mice at 3-month-chase, and  $N = 6$  mice at 1-year-chase. All tdTomato<sup>+</sup> clones in whole-mount samples from a half eye were measured and used for quantification. Data are shown as means  $\pm$  standard deviation (SD). One-way ANOVA followed by Bonferroni test. ns: not significant.

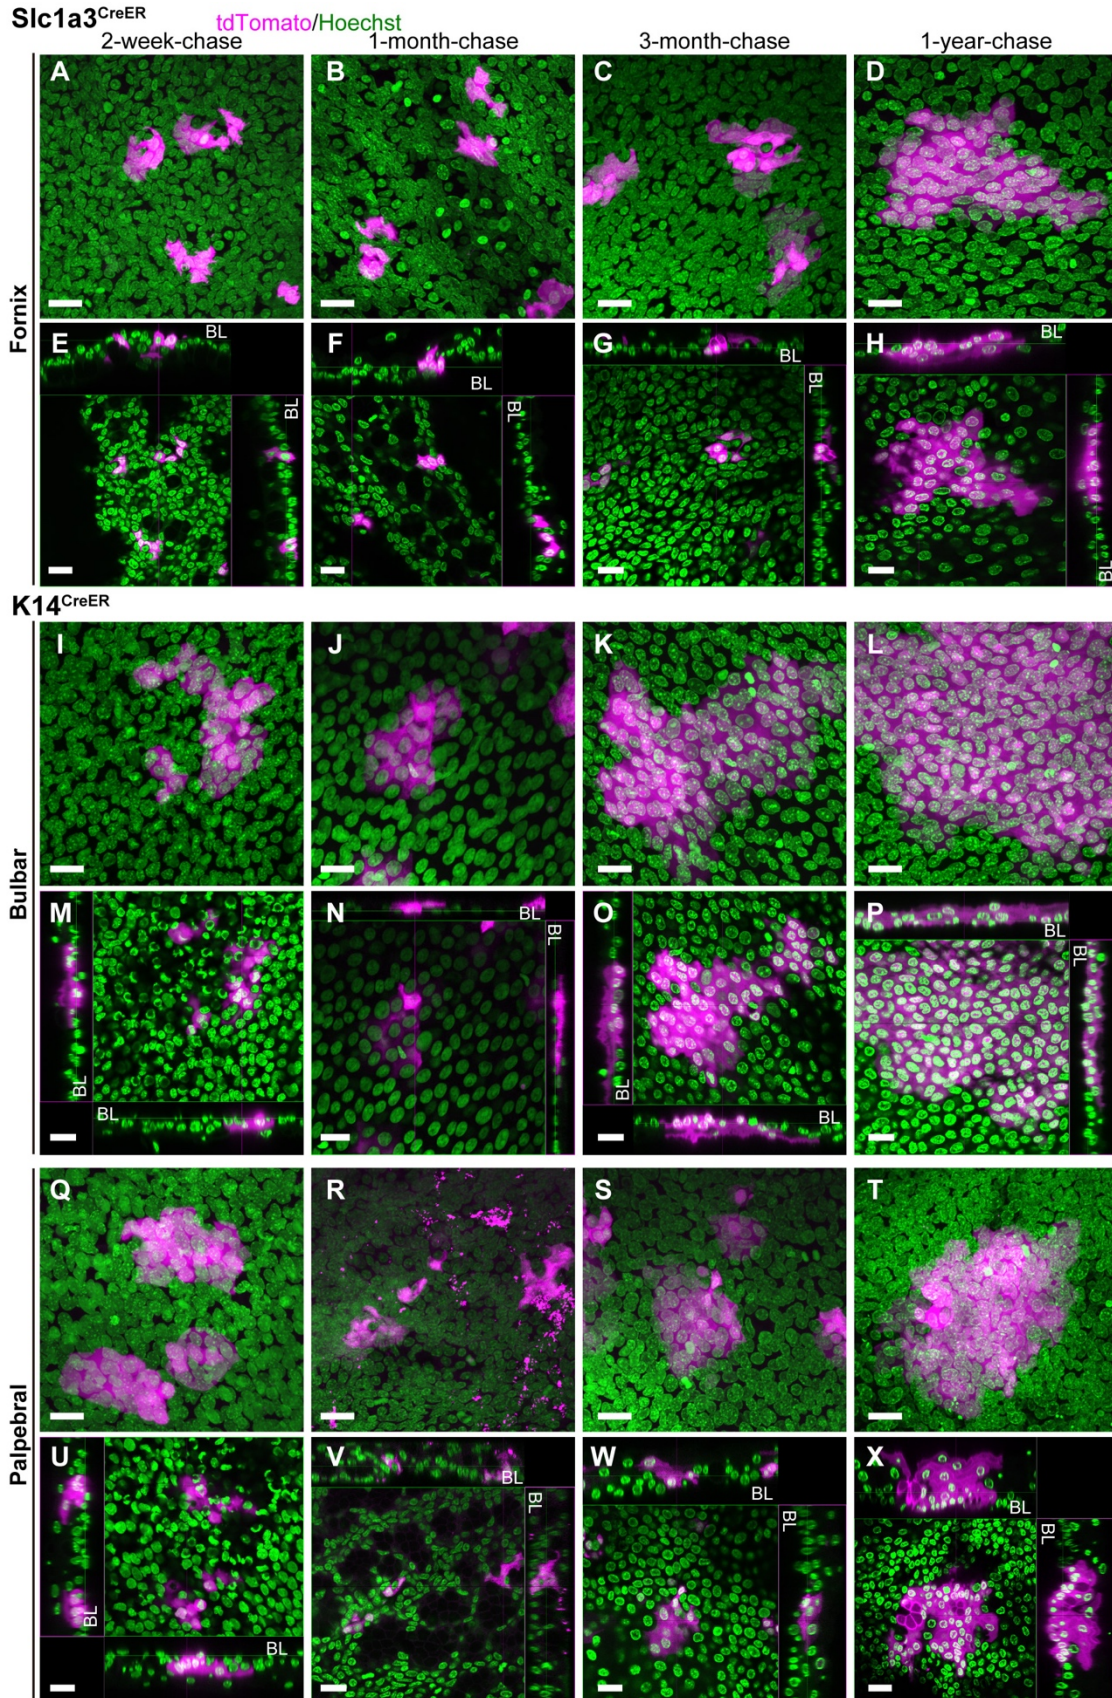

**Figure S6. Lineage tracing of Slc1a3<sup>CreER</sup> and K14<sup>CreER</sup> in the conjunctiva.** (A-H) Confocal imaging of representative clones of Slc1a3<sup>CreER</sup> in the fornix conjunctiva at 2-week-, 1-month-, 3-month-, and 1-year-chases. The areas surrounded by the yellow dashed line in Fig. 4A-D are shown. Images are shown as a maximum-intensity projection (A-D) or confocal sections of the xy, yz, and xz planes of basal clones (E-H; BL, basal layer). Magenta, tdTomato. Green, Hoechst. Scale bars: 20  $\mu$ m. (I-X) Confocal imaging of representative clones of K14<sup>CreER</sup> in the bulbar and palpebral conjunctiva at 2-week-, 1-month-, 3-month-, and 1-year-chases. The areas surrounded by the yellow dashed line in main Fig. 4I-P are shown. Images are shown as a maximum-intensity projection (I-L, Q-T) or confocal sections of xy, yz, and xz planes of basal clones (M-P, U-X; BL, basal layer). Magenta, tdTomato. Green, Hoechst. Scale bars: 20  $\mu$ m.



### Limbus deletion

Slc1a3<sup>CreER</sup>

tdTomato/K19

1-day-post-injury

2-week-post-injury

4-week-post-injury

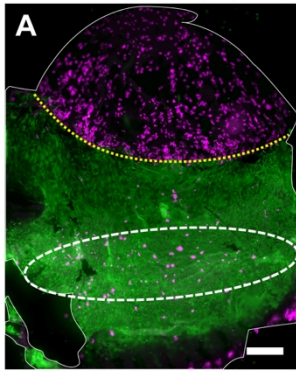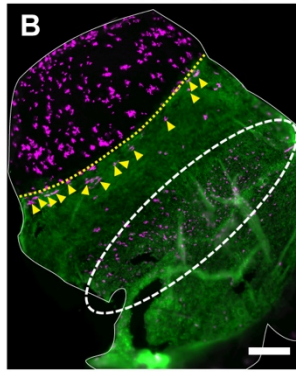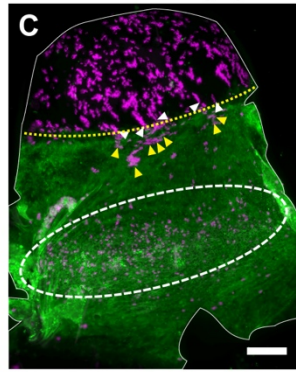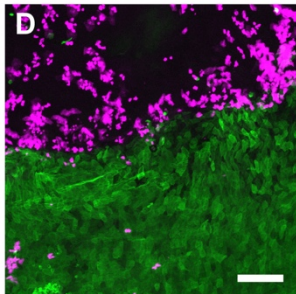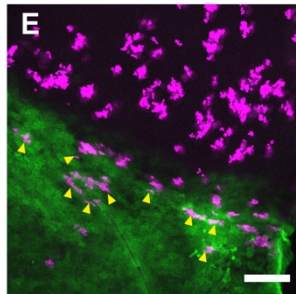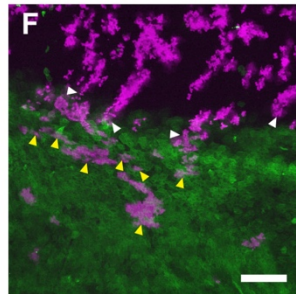

K14<sup>CreER</sup>

tdTomato/K12

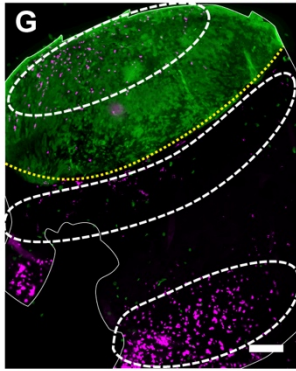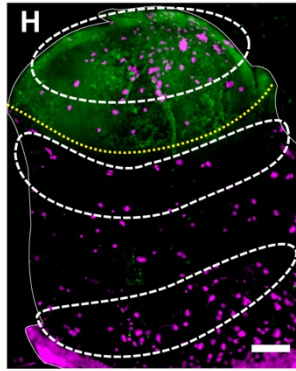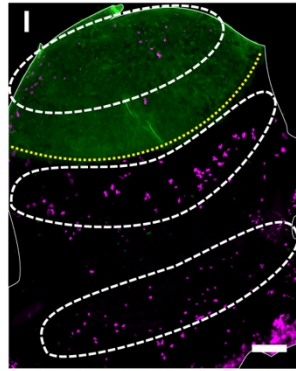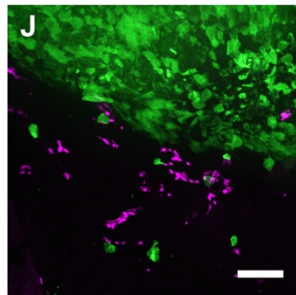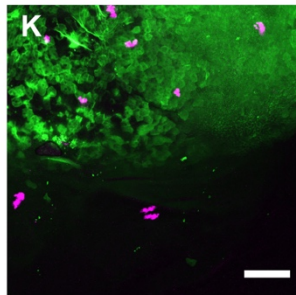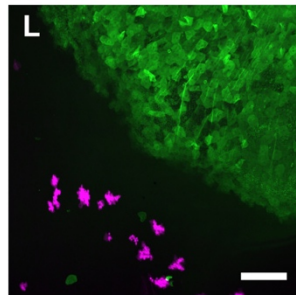

### Chemical burn

Slc1a3<sup>CreER</sup>

tdTomato/K12

2-week-post-injury

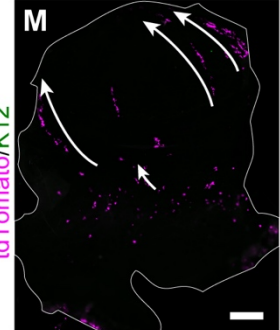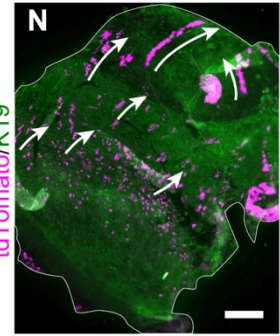

K14<sup>CreER</sup>

tdTomato/K12

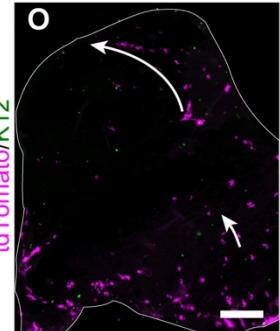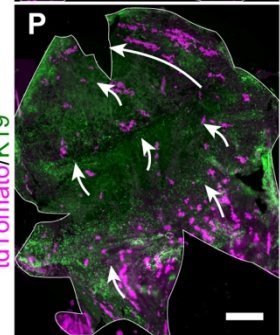

**Figure S7. Time course of injury experiments.** (A-L) Whole-mount immunostaining after limbal epithelial deletion. Data are shown 1-day-, 2-weeks-, and 4-weeks post-injury. The white line outlines the whole-mount epithelial sheets. The yellow dashed line indicates the corneal/conjunctival boundary. The white dashed line represents the tdTomato<sup>+</sup> cell-enriched area. White arrowheads indicate tdTomato<sup>+</sup> radial stripes extending from the limbus. Yellow arrowheads indicate tdTomato<sup>+</sup> clones expanding laterally within the limbal region. Magenta, tdTomato. Green, K19 (A-F, conjunctival marker) or K12 (G-L, corneal marker). Scale bars: 500  $\mu\text{m}$  (A-C, G-I), 200  $\mu\text{m}$  (D-F, J-L). (M-P) Whole-mount immunostaining after chemical burn. Data are shown 2-weeks post-injury. The white line outlines the whole-mount epithelial sheets. White arrows represent the movement of conjunctival tdTomato<sup>+</sup> clones. Magenta, tdTomato. Green, K12 (M, O, corneal marker) or K19 (N, P, conjunctival marker). Scale bars: 500  $\mu\text{m}$ .
